# Supplementary material
Source: publisher figshare collection journal article supplement (https://frontiersin.figshare.com/ndownloader/files/17891228)
Supplement: Supplementary file [file 17891228]

**Supplementary Table 1** Differential distribution of genera along the vertical oxygen gradient. Species recorded with higher abundances (DESEQ2,  $P < 0.05$ ) in (A) the epilimnetic and (B) the hypolimnetic oxygenated layers, and (C) the hypoxic and anoxic monimolimnia. Cumulative relative abundances (% on the respective totals) are reported under each lake and layer, and are highlighted as: light blue,  $1\% \leq \text{reads} < 5\%$ ; orange,  $\text{reads} \geq 5\%$ . For each layer in (A), (B) and (C), families with abundances significantly different from the other layers were reported in bold ( $P < 0.01$ ) and italic ( $P < 0.05$ ).  $u_k$  and  $t_k$  are the species optima and species tolerances of oxygen concentrations ( $\text{mg l}^{-1}$ ), respectively. Gar, Garda; Com, Como; Ise, Iseo; Lug, Lugano, Idr, Idro. epi\_oxy, oxygenated upper layers (0-20 m); hyp\_oxy, oxygenated hypolimnion; hyp\_hypox, hypoxic/anoxic hypolimnion. Taxa names are based on the SILVA 132 taxonomy.

(A)

| Phylum         | Class               | Order                 | Family                   | Genus                          | Gar  | Com  | Ise  | Lug  | Idr  | epi_oxy | hyp_oxy | hyp_hypox | uk    | tk   |
|----------------|---------------------|-----------------------|--------------------------|--------------------------------|------|------|------|------|------|---------|---------|-----------|-------|------|
| Proteobacteria | Alphaproteobacteria | Acetobacterales       | Acetobacteraceae         | Roseomonas                     | 2.99 | 0.15 | 0.90 | 0.37 | 0.92 | 4.94    | 0.36    | 0.02      | 10.99 | 1.43 |
|                | Alphaproteobacteria | Rhodobacterales       | <b>Rhodobacteraceae</b>  | Pseudorhodobacter              | 0.15 | 0.20 | 0    | 0.35 | 0.04 | 0.74    | 0       | 0         | 11.93 | 1.60 |
|                | Alphaproteobacteria | Sphingomonadales      | Sphingomonadaceae        | Sandarakinorhabdus             | 1.25 | 0.38 | 0    | 6.70 | 0.62 | 8.88    | 0.08    | 0         | 10.87 | 1.77 |
|                | Gammaproteobacteria | Betaproteobacteriales | Burkholderiaceae         | Lautropia                      | 0.36 | 0    | 2.13 | 0    | 0.46 | 2.91    | 0.04    | 0         | 10.12 | 1.05 |
|                | Gammaproteobacteria | Betaproteobacteriales | Burkholderiaceae         | Polaromonas                    | 1.14 | 2.17 | 0.41 | 1.53 | 0.47 | 5.32    | 0.39    | 0         | 11.35 | 1.61 |
| Actinobacteria | Actinobacteria      | Micrococcales         | <b>Microbacteriaceae</b> | Candidatus_Aquiluna            | 0.49 | 0    | 0.32 | 1.45 | 0.80 | 3.00    | 0.07    | 0         | 11.03 | 1.19 |
|                | Actinobacteria      | Micrococcales         | <b>Microbacteriaceae</b> | Candidatus_Planktoluna         | 0    | 0.70 | 0    | 0.01 | 0.12 | 0.83    | 0       | 0         | 11.23 | 0.66 |
| Bacteroidetes  | Bacteroidia         | Flavobacteriales      | <b>Flavobacteriaceae</b> | Flavobacterium                 | 21.6 | 9.31 | 1.07 | 30.9 | 7.88 | 64.9    | 5.42    | 0.43      | 11.19 | 1.48 |
| Cyanobacteria  | Oxyphotobacteria    | Nostocales            | <b>Nostocaceae</b>       | Aphanizomenon (Dolichospermum) | 0.22 | 0    | 41.1 | 0    | 0.75 | 41.6    | 0.37    | 0.03      | 8.65  | 0.49 |
| Spirochaetes   | Leptospirae         | Leptospirales         | <b>Leptospiraceae</b>    | Leptospira                     | 0.03 | 0.28 | 0.21 | 0    | 0.09 | 0.61    | 0       | 0         | 10.68 | 0.86 |

(B)

| Phylum          | Class               | Order                 | Family                              | Genus                 | Gar  | Com  | Ise  | Lug  | Idr  | epi_oxy | hyp_oxy | hyp_hypox | uk   | tk   |
|-----------------|---------------------|-----------------------|-------------------------------------|-----------------------|------|------|------|------|------|---------|---------|-----------|------|------|
| Proteobacteria  | Alphaproteobacteria | Rhizobiales           | Beijerinckiaceae                    | Methylocystis         | 0.09 | 1.05 | 0    | 0    | 0    | 0       | 1.14    | 0         | 9.72 | 0.95 |
|                 | Alphaproteobacteria | SAR11_clade           | <b>Clade_I</b>                      | Clade_Ia              | 1.50 | 0.49 | 0.07 | 0    | 0    | 0       | 2.06    | 0         | 9.27 | 1.31 |
|                 | Gammaproteobacteria | Alteromonadales       | <b>Alteromonadaceae</b>             | Rheinheimera          | 1.13 | 0.58 | 0.07 | 0.12 | 0    | 0.03    | 1.79    | 0.08      | 8.34 | 2.28 |
|                 | Gammaproteobacteria | Betaproteobacteriales | <i>Nitrosomonadaceae</i>            | MND1                  | 5.46 | 2.06 | 0.36 | 0.26 | 0.12 | 0.18    | 7.99    | 0.09      | 8.55 | 1.70 |
| Acidobacteria   | Acidobacteriia      | Solibacterales        | <i>Solibacteraceae (Subgroup_3)</i> | Bryobacter            | 0.64 | 0.19 | 0    | 0.03 | 0    | 0       | 0.87    | 0         | 9.07 | 1.33 |
|                 | Acidobacteriia      | Solibacterales        | <i>Solibacteraceae (Subgroup_3)</i> | Candidatus_Solibacter | 0.17 | 0.27 | 0.33 | 0.15 | 0.02 | 0.07    | 0.86    | 0         | 8.34 | 1.92 |
| Actinobacteria  | Acidimicrobiia      | Microtrichales        | <b>Iamiaceae</b>                    | Iamia                 | 0.52 | 0.90 | 0.06 | 0.09 | 0    | 0       | 1.57    | 0         | 8.73 | 1.65 |
| Armatimonadetes | Chthonomonadetes    | Chthonomonadales      | <b>Chthonomonadaceae</b>            | Chthonomonas          | 0.05 | 0.66 | 0.16 | 0.07 | 0    | 0       | 0.93    | 0         | 8.91 | 1.68 |
| Bacteroidetes   | Bacteroidia         | Chitinophagales       | Saprospiraceae                      | Haliscomenobacter     | 1.23 | 0    | 0    | 0    | 0    | 0       | 1.23    | 0         | 7.07 | 1.10 |
| Planctomycetes  | Planctomycetacia    | Gemmatales            | <b>Gemmataceae</b>                  | Gemmata               | 0.99 | 1.18 | 0.58 | 0.17 | 0    | 0.02    | 2.89    | 0         | 8.86 | 1.63 |

(C)

| Phylum | Class | Order | Family | Genus | Gar | Com | Iseo | Lug | Idro | epi_oxy | hyp_oxy | hyp_hypox | uk | tk |
|--------|-------|-------|--------|-------|-----|-----|------|-----|------|---------|---------|-----------|----|----|
|--------|-------|-------|--------|-------|-----|-----|------|-----|------|---------|---------|-----------|----|----|

|                    |                     |                      |                            |                                 |      |      |       |       |       |      |      |       |      |      |
|--------------------|---------------------|----------------------|----------------------------|---------------------------------|------|------|-------|-------|-------|------|------|-------|------|------|
| Proteobacteria     | Deltaproteobacteria | Desulfobacterales    | <b>Desulfobacteraceae</b>  | Desulfatirhabdium               | 0    | 0    | 1.04  | 0.94  | 0.52  | 0    | 0    | 2.50  | 0.08 | 0.16 |
|                    | Deltaproteobacteria | Desulfobacterales    | <b>Desulfobacteraceae</b>  | Desulfobacula                   | 0    | 0    | 0.29  | 0.55  | 0     | 0    | 0    | 0.84  | 0.05 | 0.04 |
|                    | Deltaproteobacteria | Desulfobacterales    | <b>Desulfobacteraceae</b>  | Sva0081_sediment_group          | 0.01 | 0    | 0.01  | 0.09  | 0.66  | 0    | 0.01 | 0.76  | 0.35 | 0.79 |
|                    | Deltaproteobacteria | Desulfobacterales    | <b>Desulfobulbaceae</b>    | Desulfurivibrio                 | 0    | 0    | 0     | 0     | 5.32  | 0    | 0    | 5.32  | 0.58 | 0.62 |
|                    | Deltaproteobacteria | Syntrophobacterales  | <b>Syntrophaceae</b>       | Desulfobacca                    | 0    | 0    | 0     | 11.16 | 2.42  | 0    | 0.02 | 13.55 | 0.12 | 0.37 |
|                    | Deltaproteobacteria | Syntrophobacterales  | <b>Syntrophaceae</b>       | Desulfomonile                   | 0    | 0    | 0     | 0     | 15.40 | 0.01 | 0    | 15.39 | 0.22 | 0.30 |
|                    | Deltaproteobacteria | Syntrophobacterales  | <b>Syntrophaceae</b>       | Syntrophus                      | 0    | 0    | 0.16  | 3.61  | 0.86  | 0    | 0    | 4.63  | 0.12 | 0.25 |
|                    | Gammaproteobacteria | Betaproteobacterales | Gallionellaceae            | Gallionella                     | 0    | 0    | 0     | 5.04  | 0     | 0    | 0    | 5.04  | 0.05 | 0.04 |
|                    | Gammaproteobacteria | Betaproteobacterales | <b>Methylophilaceae</b>    | Methylothera                    | 0.33 | 2.76 | 3.76  | 23.75 | 14.16 | 0.03 | 4.35 | 40.38 | 1.42 | 2.70 |
|                    | Gammaproteobacteria | Betaproteobacterales | <b>Rhodocyclaceae</b>      | Dechloromonas                   | 0    | 0    | 0     | 0.59  | 0     | 0    | 0    | 0.59  | 0.07 | 0.08 |
|                    | Gammaproteobacteria | Betaproteobacterales | <b>Rhodocyclaceae</b>      | Denitratisoma                   | 0    | 0    | 8.37  | 1.54  | 0.05  | 0    | 0.13 | 9.83  | 0.26 | 0.70 |
|                    | Gammaproteobacteria | Betaproteobacterales | <b>Rhodocyclaceae</b>      | Sterolibacterium                | 0    | 0    | 1.23  | 1.20  | 0     | 0    | 0.05 | 2.38  | 0.37 | 0.91 |
|                    | Gammaproteobacteria | Betaproteobacterales | <b>Rhodocyclaceae</b>      | Sulfuritalea                    | 0.01 | 0    | 1.56  | 0.19  | 0.42  | 0    | 0.01 | 2.17  | 0.47 | 1.03 |
|                    | Gammaproteobacteria | Methylococcales      | <b>Methylomonaceae</b>     | Crenothrix                      | 0.88 | 1.73 | 0.70  | 26.95 | 8.49  | 0    | 2.83 | 35.93 | 1.16 | 2.45 |
|                    | Gammaproteobacteria | Methylococcales      | <b>Methylomonaceae</b>     | Methyloglobulus                 | 0    | 0    | 0.29  | 0.55  | 0.14  | 0    | 0.05 | 0.94  | 0.67 | 1.33 |
|                    | Gammaproteobacteria | Methylococcales      | <b>Methylomonaceae</b>     | pLW-20                          | 0    | 0    | 1.17  | 20.78 | 1.60  | 0.06 | 0.73 | 22.76 | 0.50 | 1.26 |
| Epsilonbacteraeota | Campylobacteria     | Campylobacterales    | <b>Thiovulaceae</b>        | Sulfuricurvum                   | 0    | 0    | 0.03  | 0.06  | 69.12 | 0    | 0    | 69.21 | 0.26 | 0.17 |
|                    | Campylobacteria     | Campylobacterales    | <b>Thiovulaceae</b>        | Sulfurimonas                    | 0    | 0    | 0.20  | 0     | 9.67  | 0    | 0    | 9.87  | 0.30 | 0.33 |
| Bacteroidetes      | Bacteroidia         | Bacteroidales        | <b>Paludibacteraceae</b>   | Paludibacter                    | 0    | 0    | 2.64  | 0.12  | 0.48  | 0.04 | 0    | 3.20  | 0.12 | 0.62 |
|                    | Bacteroidia         | Bacteroidales        | <b>Prolixibacteraceae</b>  | BSV13                           | 0    | 0    | 5.23  | 2.99  | 1.25  | 0    | 0    | 9.48  | 0.24 | 0.43 |
| Chlamydiae         | Chlamydiae          | Chlamydiales         | <i>Parachlamydiaceae</i>   | Candidatus<br>Protochlamydia    | 0    | 0.05 | 0.97  | 0.01  | 0     | 0.01 | 0.05 | 0.97  | 1.02 | 3.02 |
| Chloroflexi        | Anaerolineae        | Anaerolineales       | Anaerolineaceae            | GWD2-49-16                      | 0    | 0    | 0     | 1.81  | 0.01  | 0    | 0    | 1.83  | 0.07 | 0.16 |
|                    | Anaerolineae        | Anaerolineales       | Anaerolineaceae            | Longilinea                      | 0    | 0    | 0     | 0.58  | 1.69  | 0    | 0    | 2.27  | 0.21 | 0.31 |
|                    | Anaerolineae        | Anaerolineales       | Anaerolineaceae            | Pelolinea                       | 0    | 0    | 0     | 0.69  | 0.04  | 0    | 0    | 0.73  | 0.06 | 0.08 |
| Firmicutes         | Clostridia          | Clostridiales        | <b>Family_XIII</b>         | Anaerovorax                     | 0    | 0    | 0.59  | 0.03  | 0.03  | 0    | 0    | 0.64  | 0.05 | 0.02 |
| Kiritimatiellaeota | Kiritimatiellae     | Kiritimatiellales    | <b>Kiritimatiellaceae</b>  | MSBL3                           | 0    | 0    | 0.35  | 1.78  | 1.60  | 0    | 0    | 3.73  | 0.16 | 0.30 |
| Planctomycetes     | Planctomycetacia    | Pirellulales         | Pirellulaceae              | Candidatus<br>Anammoximicrobium | 0    | 0    | 0     | 1.23  | 0.99  | 0    | 0    | 2.22  | 0.23 | 0.43 |
| Rokubacteria       | NC10                | Methyloirabiales     | <b>Methylomirabilaceae</b> | Candidatus<br>Methylomirabilis  | 0    | 0    | 12.12 | 5.92  | 0     | 0    | 0.11 | 17.93 | 0.19 | 0.49 |
|                    | NC10                | Methyloirabiales     | <b>Methylomirabilaceae</b> | Sh765B-TzT-35                   | 0    | 0    | 0     | 0.87  | 0.39  | 0    | 0    | 1.26  | 0.11 | 0.11 |
| Verrucomicrobia    | Verrucomicrobiae    | Opitutales           | Opitutaceae                | Opitutus? (Cephalotococcus)     | 0    | 0    | 1.04  | 0.45  | 0.55  | 0    | 0    | 2.04  | 0.23 | 0.40 |
|                    | Verrucomicrobiae    | Pedosphaerales       | Pedosphaeraceae            | ADurb.Bin063-1                  | 0    | 0    | 0.08  | 0.04  | 0.20  | 0    | 0    | 0.32  | 0.73 | 0.74 |
